# Supplementary material
Source: PubMed Central journal article supplement (PMC5725377)
Supplement: 12264_2017_157_MOESM1_ESM.pdf [file 12264_2017_157_MOESM1_ESM.pdf]

## Supplementary Material

### Crocetin potentiates neurite growth in hippocampal neurons and facilitates functional recovery in rats with spinal cord injury

Xiqian Wang, Xiejia Jiao, Zhonghao Liu, Yixin Li

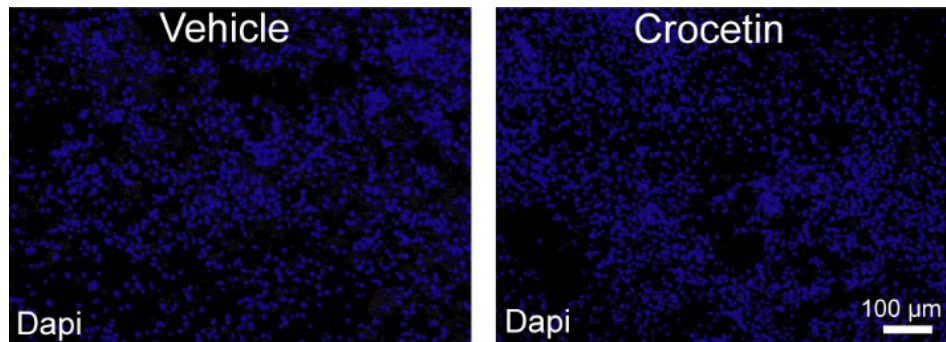

**Figure S1.** Crocetin treatment does not affect the cell number in the lesion site of spinal cord (7 days post-injury).
